# Supplementary material
Source: Research Square preprint supplement (doi:10.21203/rs.3.rs-9086701/v1)
Supplement: Supplementary file 1 [file a3c3914a5ad24e697034a7ae.docx]

**Supplementary Information**

**Autonomous Atomic-Scale Self-healing in Two-Dimensional MXenes *via* Diffusion-Driven Lattice Reconstruction**

Jiaoli Li 1, Matthew G. Boebinger 2, Kun Luo 3, Yanxiao Li 4, Wenpei Gao 5, Qi An *,3, Chenglin Wu*,1

1Zachry Department of Civil and Environmental Engineering, Texas A&M University, College Station, TX, 77843, USA

2Center for Nanophase Materials Science, Oak Ridge National Laboratory, Oak Ridge, TN 37830, USA

3Department of Materials Science and Engineering, Iowa State University, Ames, IA, 50011, USA

4National Energy Technology Laboratory (NETL), NETL Support Contractor, Pittsburgh, PA, 15236, USA

5Department of Materials Science and Engineering, North Carolina State University, Raleigh, NC, 27606, USA

*Corresponding author E-mail: [qan@iastate.edu](mailto:qan@iastate.edu), [chenglinwu@tamu.edu](mailto:chenglinwu@tamu.edu)

**Section 1: Experimental Results**

**Supplementary Fig. 1 | Temperature-dependent nanopore evolution in bilayer Ti2C MXene.** **a**, Time-resolved HAADF-STEM images showing nanopore evolution in bilayer Ti2C MXene at 250 °C (top row) and 500 °C (bottom row) following electron-beam drilling. At 250 °C, the nanopore initially expands and subsequently contracts, indicating partial self-healing, whereas at 500 °C the nanopore continuously enlarges without recovery. **b**, Corresponding temporal evolution of Ti and C atomic vacancies extracted from HAADF image analysis at 250 °C (top) and 500 °C (bottom). At 250 °C, vacancy populations peak and then decrease, consistent with diffusion-driven healing, while at 500 °C vacancy numbers increase monotonically, reflecting thermally induced structural instability and the suppression of self-healing.

**Supplementary Fig. 2 | Temperature-dependent nanopore evolution and self-healing in monolayer TiVCrMoC3 MXene. a,** Time-resolved HAADF-STEM images of monolayer TiVCrMoC3 during electron-beam milling and post-irradiation evolution at room temperature (RT, top row) and 500 °C (bottom row). At RT, nanopore formation is followed by continued pore growth without recovery, whereas at 500 °C the nanopore forms transiently and subsequently contracts, indicating thermally activated self-healing. **b,** Corresponding temporal evolution of transition-metal and carbon vacancy populations extracted from HAADF image analysis at RT (top) and 500 °C (bottom). At RT, vacancy numbers increase and stabilize, consistent with irreversible defect growth, while at 500 °C vacancy populations peak and then decrease to near-zero values, confirming complete nanopore healing. Scale bar, 1 nm.

**Supplementary Fig. 3 | Adlayer-mediated nanopore self-healing in multilayer Ti₃C₂ MXene at 250 °C. a,** Time-resolved HAADF-STEM images and corresponding FFT-filtered images showing autonomous nanopore self-healing in multilayer Ti3C2 MXene following electron-beam irradiation at 250 °C. Regions inside the nanopore (Area 1) and in the surrounding lattice (Area 2) are indicated. **b**, Temporal evolution of HAADF intensity within the nanopore and surrounding regions during self-healing. The progressive increase in intensity within the nanopore, accompanied by a decrease in the surrounding region, indicates material transport from adjacent lattice and adlayer regions into the defect until structural reconstruction is achieved.

**Section 2: Modelling Results**

**Supplementary Fig. 4 | Molecular dynamics snapshots of nanopore self-healing in monolayer MXenes.** **a**, Representative top-view snapshots from molecular dynamics simulations of nanopore self-healing in monolayer Ti3C2 at room temperature, 250 °C, and 500 °C. **b,** Corresponding MD snapshots for monolayer TiVCrMoC3 at 500 °C. For each case, the leftmost panel shows the largest nanopore morphology observed experimentally by in situ TEM. The initial atomic configurations used in the MD simulations were constructed directly from these experimentally observed nanopore geometries to ensure consistency between simulation initial conditions and experimentally relevant defect states. Subsequent panels show the temporal evolution of atomic configurations during self-healing, highlighting temperature- and composition-dependent healing dynamics.

**Supplementary Fig. 5 | Molecular dynamics simulation of autonomous self-healing in monolayer Ti3C2 at room temperature. a**, Sequential top-view snapshots from MD simulations showing the evolution of a nanopore during self-healing in monolayer Ti3C2 at room temperature. Ti and C atoms are rendered as large and small spheres, respectively, and are colored according to their per-atom potential energy. Blue and red arrows indicate the displacement vectors of Ti and C atoms between successive frames. Corresponding side views illustrate atomic rearrangements during healing and the cross-sectional morphology after complete lattice reconstruction. **b**, Temporal evolution of the total potential energy of the system during self-healing, showing a monotonic decrease as high-energy atoms migrate into lower-energy configurations.

**Supplementary Fig. 6 | Molecular dynamics simulation of nanopore self-healing in monolayer Ti3C2 at 500 °C. a,** Sequential top-view snapshots from MD simulations showing nanopore evolution and self-healing in monolayer Ti3C2 at 500 °C. Ti and C atoms are shown as large and small spheres, respectively, and are colored according to their per-atom potential energy. Blue and red arrows denote displacement vectors of Ti and C atoms between successive frames. Corresponding side views illustrate atomic rearrangements during healing and the cross-sectional morphology after lattice reconstruction. **b,** Temporal evolution of the total potential energy of the system during self-healing, showing a continuous decrease as high-energy atoms migrate into energetically favorable configurations.

**Supplementary Fig. 7 | Molecular dynamics simulation of nanopore self-healing in monolayer TiVCrMoC3 at 500 °C. a,** Sequential top-view snapshots from MD simulations showing nanopore evolution and autonomous self-healing in monolayer TiVCrMoC3 at 500 °C. Transition-metal atoms (Ti, V, Cr, Mo) and C atoms are rendered as large and small spheres, respectively, and are colored according to their per-atom potential energy. Blue and red arrows indicate displacement vectors of transition-metal and C atoms between successive frames. Corresponding side views illustrate atomic rearrangements during healing and the cross-sectional morphology after lattice reconstruction. **b,** Temporal evolution of the total potential energy of the system during self-healing, showing an overall decrease as high-energy atoms migrate into energetically favorable configurations.

**Supplementary Fig. 8 | Quantitative comparison of nanopore vacancy evolution from experiment and simulation.** Temporal evolution of atomic column vacancies within nanopores extracted from in situ TEM experiments (left) and molecular dynamics simulations (right). Data are shown for monolayer Ti3C2 at room temperature, monolayer Ti3C2 at 250 °C, multilayer Ti3C2 at 250 °C, and monolayer TiVCrMoC3 at 500 °C. Across all cases, experiment and simulation exhibit consistent trends in vacancy reduction kinetics, including an initially rapid healing stage followed by a slower recovery, validating the ability of the simulations to capture the essential diffusion-driven self-healing dynamics.

**Section 3 Methodology**

**3.1 Machine-Learning Potential for TiC**

We developed a DeePMD-based machine-learning potential (MLP) for TiC as the foundational model for subsequent layered Ti–C and multicomponent studies1. The training set was constructed with DP-GEN concurrent learning2, iterating exploration → uncertainty-aware selection → ab-initio labeling → retraining —and continued until coverage saturation. Unless otherwise stated, all numerical settings and hyperparameters reported below were held fixed across the campaign.

**Kick-off seeds.** The initial data set used to bootstrap the TiC potential was generated by systematically perturbing DFT-relaxed prototypes spanning both 3D and 2D bonding environments: cubic TiC, monolayer Ti3C2 (1L-Ti3C2), elemental Ti, graphite, and diamond. For each prototype, we first constructed supercells whose minimum cell edge exceeded twice the DeePMD neighbor cutoff (≥10 Å) to avoid truncation artifacts; for 2D slabs the *z*-direction contained ≥10 Å of vacuum. Each supercell was then uniformly scaled at 300 K3 using stretch factors a ∈ {0.9, 1.0, 1.1}. Around each scaled state we generated eight randomly perturbed variants by applying simultaneous stochastic displacements to (i) atomic positions (0.02 Å amplitude) and (ii) cell vectors (5% affine strains), without symmetry constraints. From these perturbed configurations we launched short canonical (NVT) ab initio molecular dynamics (AIMD) at 300 K (VASP), running 10 steps per variant and recording coordinates, forces, total energies, and virial tensors at every step. The AIMD frames across all prototypes constituted the kick-off ensemble used to train the initial DeePMDmodel, which in turn seeded the Stage 1 exploration.

**Exploration strategy and staged sampling.** To maximize efficiency while ensuring breadth, we adopted a three-stage sampling strategy. All exploration MD was run in LAMMPS (NVT) using the current MLP1,4. Minimum simulation-cell edges always exceeded 10 Å to avoid truncation artifacts. Stage 1 - Bulk coverage (10 K → 2Tm). We sampled bulk Ti–C over a wide thermal envelope from 10 K up to 2Tm ≈ 7000 K, where 2 Tm is defined relative to the reference melting point of TiC (≈3400 K). At each temperature, we applied a standardized 14-process deformation catalog that was identical for all materials: (i) volumetric expansion/compression with uniform scale factors 1.1 and 0.9 applied to x, y, and z; (ii) uniaxial tension and compression with scale factors 1.2 and 0.8 along each Cartesian axis (six processes total); and (iii) simple shear γ = ±0.5 for the xy, yz, and zx components (six processes). Bulk coverage included nine TiC binary structures and four elemental Ti structures from the Materials Project5, together with graphite and diamond. Stage 2 - Layered coverage (10 K → 2Tm). We next targeted layered systems relevant to nanopore healing: 1L-Ti₂C, 1L-Ti₃C₂, 1L-Ti₄C₃ and 2L-Ti₂C, 2L-Ti₃C₂. Exploration combined in-plane tension/compression and shear under temperature range from 10K~7000K. Stage 3 - Local ablation-like heating. To embed edge physics crucial for self-healing, we introduced ablation-like local heating. In each layered configuration, a fixed, circular in-plane domain of 5 Å diameter was thermostatted from 300 K to 7000 K, while the remainder of the sheet was maintained at 300 K (dual thermostat groups with a fixed region boundary; no dynamic regrouping).

**Uncertainty, stopping, and dataset size.** Uncertainty filtering used an ensemble of four DeePMD models (identical hyperparameters; different random seeds); the selection metric was the maximum per-atom force standard deviation across the ensemble. For TiC we used flo = 0.15 and fhi = 0.35 eV Å⁻¹ as the inclusion window and terminated the campaign when the fraction of visited configurations falling in this window dropped below 1%. To meet this criterion, the entire process still required human oversight, with some exploration processes repeated until the threshold was reached. The TiC model converged after 217 DP-GEN iterations, yielding 30,822 DFT-labeled configurations.

**Ab-initio labeling and training hyperparameters.** Only the single-point SCF calculations were conducted for each configuration selected from DP-GEN. All labeling calculations employed VASP3 with the spin-polarized PBE exchange–correlation functional6, a plane-wave cutoff of 520 eV, and a k-point mesh density of 0.3 Å⁻¹; the self-consistent energy tolerance was 10⁻⁶ eV. van der Waals interactions were described by DFT-D3 (BJ)7. Each DP-GEN round trained four DeePMD models1 with an embedding network of (20, 40, 80) and a fitting network of (120, 120, 120), neighbor cutoff 5 Å with smoothing length 1 Å, and minibatches containing frames with ≥32 atoms. Training used Adam for 6×10⁵ steps per round; the energy/force/virial loss prefactors ramped from (0.02, 1000, 0.02) to (1.0, 1.0, 1.0), while the learning rate decayed exponentially from 1.0×10⁻³ to 3.51×10⁻⁸. After convergence, we performed a final consolidation training on the aggregated dataset for 1×10⁷ steps with all other settings unchanged. This refined TiC potential was subsequently used for the production MD simulations reported in this work.

**3.2 Extension to TiVCrMoC Systems**

The multicomponent study reused the identical three-stage protocol (bulk → layered → local ablation-like heating) and all numerical settings described for TiC, with changes only in chemical space, and uncertainty thresholds. Element types were encoded separately in DeePMD (Ti, C, V, Cr, Mo).

**Chemical space and structure sets.** Bulk coverage comprised Cr₄C3, Mo4C3, V4C3, Cr3C₂, CrC, elemental Cr/V/Mo, TiVCrMoC3, and TiVCrMo alloys, together with six random-occupancy variants of M₁₂C₁₂ (M= Ti, V, Cr, Mo). The 2D coverage included ten random decorations of 1LTiVCrMoC₃. Random metal placements were generated with atomsk8 via unbiased substitution on TiC-like cation sublattices. As in the TiC campaign, the 14-process deformation catalog and the fixed 5 Å-diameter ablation-like protocol from 300 to 7000 K were applied uniformly.

**Uncertainty thresholds, stopping, and dataset size.** For multicomponent systems, we modestly tightened the inclusion window flo = 0.2 and fhi = 0.4 eV Å⁻¹ while retaining the same <1% selection-rate stopping rule. The full campaign (TiC plus multicomponent extension) reached 353 DP-GEN iterations and accumulated 54,725 DFT-labeled configurations.

**Ab-initio labeling settings.** Multicomponent labeling used spin-polarized PBE with the same plane-wave cutoff, k-point density, and SCF tolerance as in TiC. DeePMD network architectures, neighbor cutoff and smoothing, batch construction, loss scheduling, and learning-rate decay were identical to the TiC settings above.

**3.3 Accuracy testing of the MLP**

Because the intended applications are nanopore healing in monolayer Ti3C2 and monolayer TiVCrMoC3, the validation set was built from those chemistries (Supplementary Fig. 9a-b). We compared energies and forces from the MLPs against DFT for the same configurations. As expected for a chemically more heterogeneous environment, the force magnitudes (and thus force errors) in TiVCrMoC3 are higher than in Ti3C2. Quantitatively, for the monolayer Ti3C2 the mean fabsolute errors (MAE) for energies and forces are 7.5 meV/atom and 39.6 meV/Å per atom, with root-mean-square errors (RMSE) of 9.5 meV/atom and 63.8 meV/Å per atom. For monolayer TiVCrMoC3, the MAEs for energies and forces are 5.0 meV/atom and 132.9 meV/Å per atom, with RMSE values of 5.9 meV/atom and 175.7 meV/Å per atom. Additionally, we compared the equation of state (EOS, energy versus volume) of Rock Salt structured TiC from both DFT and the MLP (Supplementary Fig. 9c); the MLP reproduces the EOS accurately over volume fractions ranging from 0.86 to 1.16. We also compared the MD and DFT-calculated density and elastic moduli (bulk, shear, and Young’s moduli) of Rock Salt structured TiC (see Table S1). The elastic moduli predicted by the MLP differ by less than 11.5% compared to DFT (with a ~3.4% difference for bulk modulus), while the density values agree within 0.2%. These systematic benchmarks confirm that our MLPs achieve DFT-level accuracy in describing atomic interactions in TiC and TiVCrMoC systems across a broad range of temperature, pressure, and deformation conditions.

**Supplementary Fig. 9 | Benchmarking of the machine-learning potential (MLP) against density functional theory (DFT).**

**a,** Comparison of total energies and **b**, atomic forces predicted by the MLP and DFT for monolayer Ti3C2 and TiVCrMoC3 configurations. **c**, Equations of state of rock-salt TiC calculated using DFT and molecular mechanics (MM) simulations with the MLP. The volume is normalized by the equilibrium volume, .

**Table S1.** Lattice constants (*a*, Å), density (*ρ*, g/cm³), bulk modulus (*B*), shear modulus (*G*), and Young's modulus (*E*) of Rock Salt structured TiC as predicted by the MLPs and DFT. Moduli are in GPa.

| Method | *a* | *ρ* | *B* | *G* | *E* |
| --- | --- | --- | --- | --- | --- |
| DFT | 4.292 | 5.03 | 263.8 | 193.2 | 465.9 |
| MD | 4.294 | 5.03 | 254.7 | 170.9 | 418.9 |

## **3.4 Molecular Dynamics of Nanopore Self-Healing with the Trained MLP**

All production simulations employed the trained MLPs in LAMMPS (velocity–Verlet; 1.0 fs timestep)1,4. Unless otherwise stated, dynamics were run in the NPT ensemble with Nose–Hoover coupling (typical damping 0.1 ps for the thermostat and 1.0 ps for the barostat). To balance accuracy and cost while suppressing finite-size artifacts, the in-plane simulation cell measured ≈ 3.1 nm × 3.1 nm, and a 2.0 nm vacuum gap along z; periodic boundary conditions were applied in all three directions. The initial nanopore was constructed one-to-one from experiment by deleting atoms to replicate the largest pre-healing pore observed (i.e., the pore at the onset of healing), which preserves realistic rim curvature and edge terminations.

After a brief conjugate-gradient (CG) minimization (50 steps; fixed cell), systems were equilibrated at 300 K. The temperature was then ramped under NPT from 300 K to the target over 1 ns, followed by an isothermal hold long enough to reach complete healing. Three anneal temperatures were used-1273, 1373, and 1473 K-selected after preliminary trials indicated that lower temperatures yield prohibitively slow diffusion within accessible MD times, whereas higher temperatures promote irreversible sheet degradation. Production trajectories extended up to 0.7 µs (700 ns), over which nanopore closure was routinely observed.

To obtain unambiguous structures for analysis in the presence of large high-temperature fluctuations near the pore rim, thermal noise was quenched by an additional 50 CG steps immediately before each analysis checkpoint (cell and topology fixed). This procedure preserves diffusive rearrangements while greatly improving edge identification and energetic accounting. CI-NEB calculations (LAMMPS implementation) were used to estimate minimum-energy paths and barriers for representative events (e.g., edge-adatom hops, atom migration along reconstructed rims)9: initial/final states were taken from MD snapshots, intermediate images were generated by linear interpolation, 9-16 images were used per path, and bands were relaxed until the maximum atomic force on all images fell below 1×10⁻⁴ eV Å⁻¹ (climbing image enabled). Trajectories were analyzed and rendered in OVITO; healing completion was defined by the restoration of lattice continuity in the z-projection. Where relevant, we report time-to-closure at each anneal temperature and provide corresponding structural snapshots of the molten rim and edge-reconstruction motifs.

**Reference**

1. Wang, H., Zhang, L., Han, J. & E, W. DeePMD-kit: a deep learning package for many-body potential energy representation and molecular dynamics. Comput. Phys. Commun. **228**, 178-184 (2018).
2. Zhang, Y., Wang, H., Chen, W., Zeng, J., Zhang, L., Wang, H. & E, W. DP-GEN: a concurrent learning platform for the generation of reliable deep learning based potential energy models. Comput. Phys. Commun. **253**, 107206 (2020).
3. Kresse, G. & Furthmüller, J. Efficient iterative schemes for ab initio total-energy calculations using a plane-wave basis set. Phys. Rev. B **54**, 11169-11186 (1996).
4. Thompson, A. P. et al. LAMMPS-a flexible simulation tool for particle-based materials modeling at the atomic, meso, and continuum scales. Comput. Phys. Commun. **271**, 108171 (2022).
5. Jain, A. et al. Commentary: the Materials Project: a materials genome approach to accelerating materials innovation. APL Mater. **1**, 011002 (2013).
6. Perdew, J. P., Burke, K. & Ernzerhof, M. Generalized gradient approximation made simple. Phys. Rev. Lett. **77**, 3865–3868 (1996).
7. Grimme, S., Antony, J., Ehrlich, S. & Krieg, H. A consistent and accurate ab initio parametrization of density functional dispersion correction (DFT-D) for the 94 elements H-Pu. J. Chem. Phys. **132**, 154104 (2010).
8. Hirel, P. Atomsk: a tool for manipulating and converting atomic data files. Comput. Phys. Commun. **197**, 212-219 (2015).
9. Henkelman, G. & Jónsson, H. Improved tangent estimate in the nudged elastic band method for finding minimum energy paths and saddle points. J. Chem. Phys. **113**, 9978-9985 (2000).
